# Supplementary material for: Elucidation of Complex Nature of PEG Induced Drought-Stress Response in Rice Root Using Comparative Proteomics Approach
Source: PubMed Central journal article supplement (PMC5040710; doi:10.3389/fpls.2016.01466), 2016-09-29

*Supplementary Material*

**Elucidation of complex nature of PEG induced drought-stress response in rice root using comparative proteomics approach**

Lalit Agrawal, Swati Gupta\*, Shashank Kumar Mishra\*, Garima Pandey, Susheel Kumar, Puneet Singh Chauhan, Debasis Chakrabarty, Chandra Shekhar Nautiyal<sup>#</sup>

<sup>#</sup>Correspondence:

Chandra Shekhar Nautiyal Email: [nautiyalnbri@lycos.com](mailto:nautiyalnbri@lycos.com), Telephone: +91-522-2205848, Fax: +91-522-2205839

**Supplementary Figure S1:** Heat map of expression of differentially regulated proteins of rice root present within each cluster.

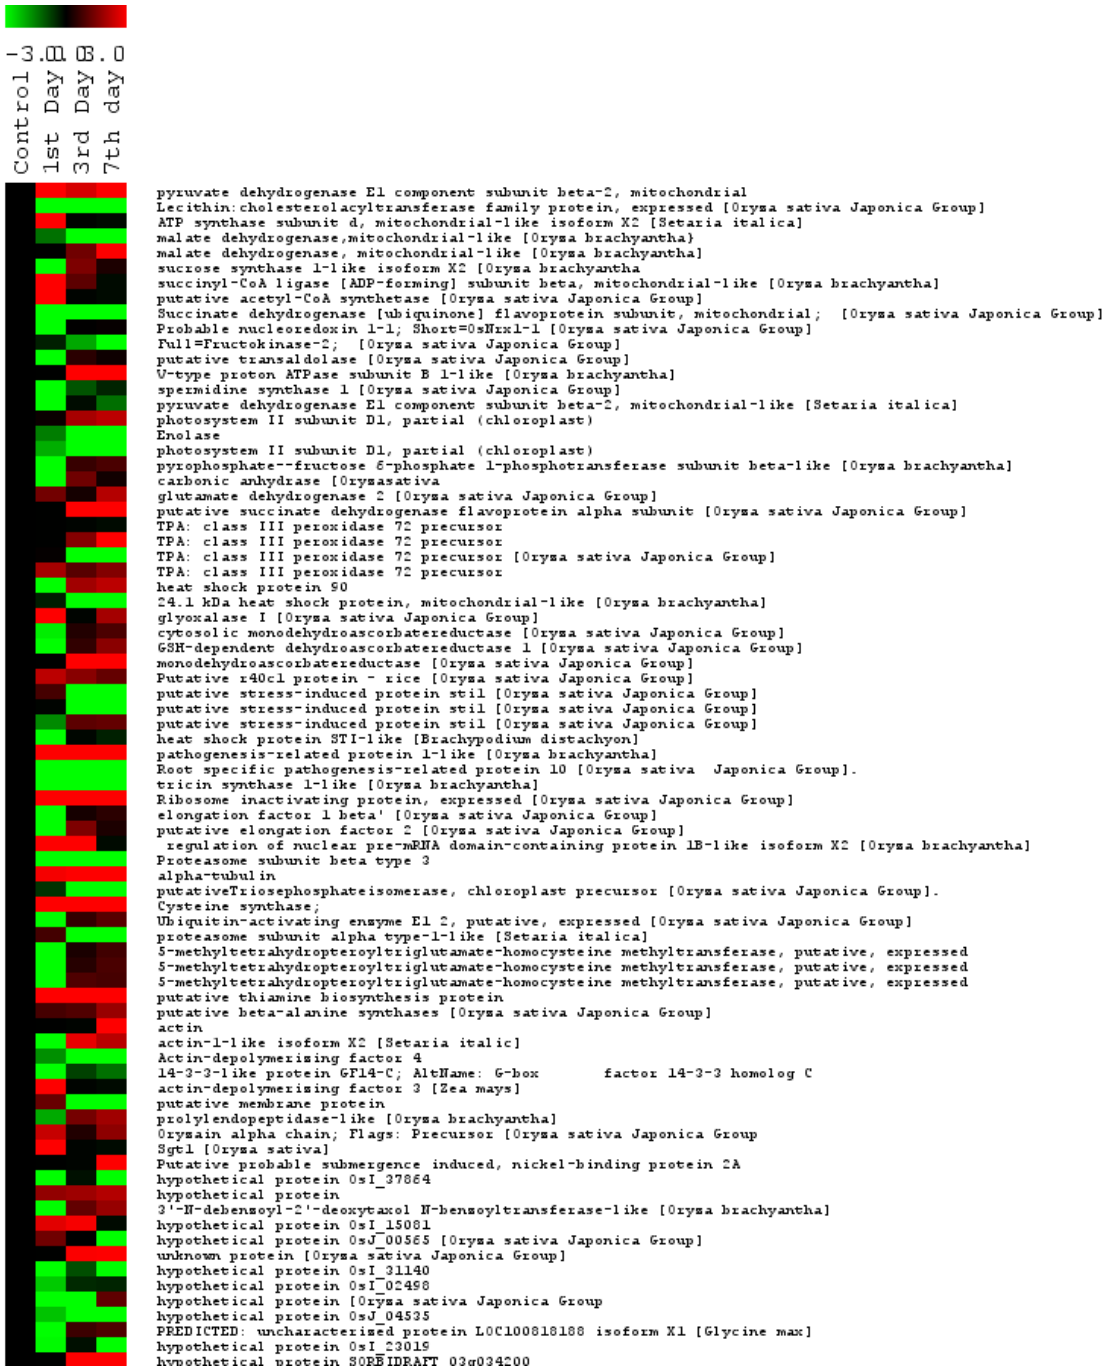

Supplement: DataSheet3.pdf [file DataSheet3.pdf]
